# Supplementary material for: Laminated magnetic graphene with enhanced electromagnetic wave absorption properties
Source: Royal Society of Chemistry journal article supplement (doi:10.1039/c2tc00159d), 2012-10-30
Supplement: c2tc00159d.pdf [file c2tc00159d.pdf]

# Supporting Information:

## Laminated Magnetic Graphene with Enhanced Electromagnetic Wave Absorption Properties

Xin Sun, Jianping He,\* Guoxian Li, Jing Tang, Tao Wang, Yunxia Guo, and Hairong Xue  
College of Material Science and Technology, Nanjing University of Aeronautics and Astronautics,  
Nanjing, Jiangsu 210016, P. R. China

\*Corresponding author. Tel: +86 25 52112900; Fax: +86 25 52112626; E-mail address:  
jianph@nuaa.edu.cn

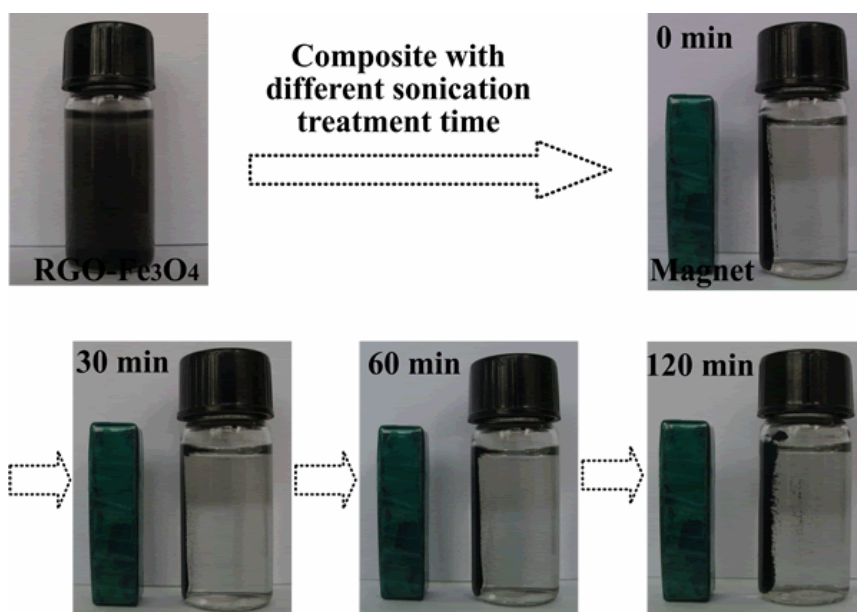

Figure S1. RGO-Fe<sub>3</sub>O<sub>4</sub> composite with different sonication (ultrasonic power: 100 W) treatment time and was separated from the solution by an external magnetic field.

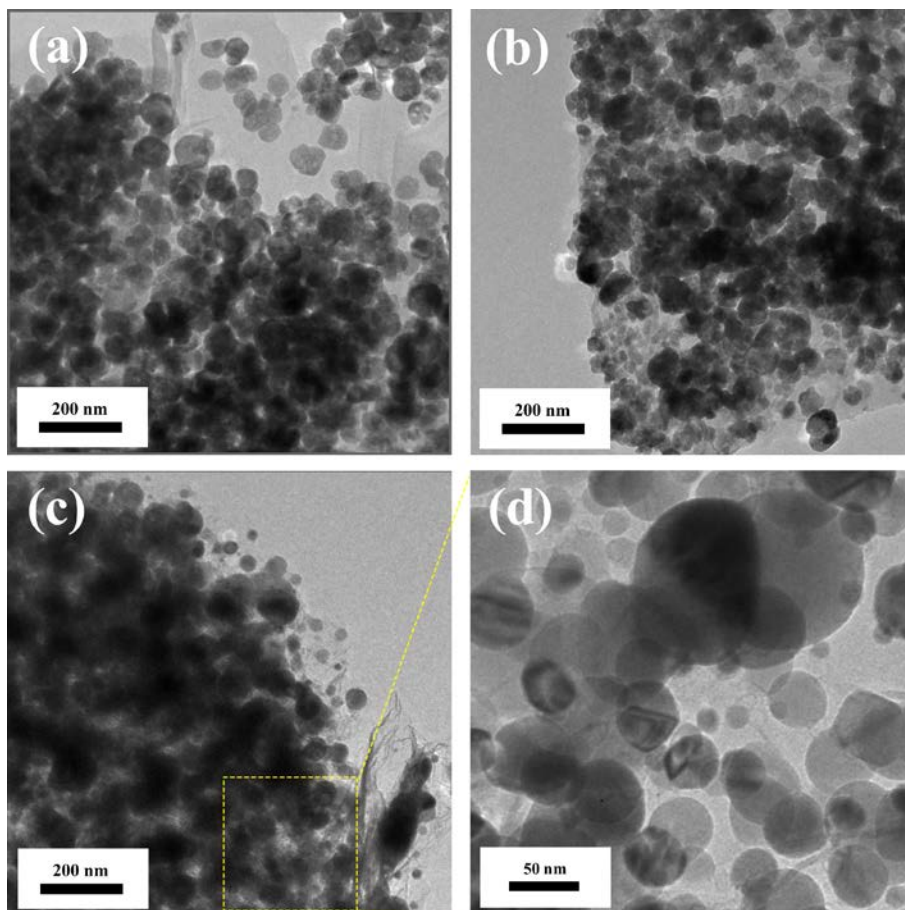

Figure S2. TEM images of as-prepared RGO-Fe<sub>3</sub>O<sub>4</sub> composites with the content of Fe<sup>3+</sup> ion increasing while keeping all the other reaction conditions the same for the previous synthesis. (a): C(Fe<sup>3+</sup>)=82.2 mmol/L; (b): C(Fe<sup>3+</sup>)=92.5 mmol/L; (c): C(Fe<sup>3+</sup>)=102.8 mmol/L; (d): a partial high-resolution image of (c).
